# Supplementary material for: The catalytic subunit of Plasmodium falciparum casein kinase 2 is essential for gametocytogenesis
Source: PubMed Central journal article supplement (PMC7954856; doi:10.1038/s42003-021-01873-0), 2021-03-12
Supplement: 42003_2021_1873_MOESM3_ESM.pdf [file 42003_2021_1873_MOESM3_ESM.pdf]

## Description of Additional Supplementary Files

**File name:** Supplementary Data 1

**Description:** Source data underlying plots shown in figures.
